# Supplementary material for: A survey of United States adult privacy perspectives and willingness to share real-world data
Source: PubMed Central journal article supplement (PMC10052457; doi:10.1017/cts.2023.4), 2023-02-01
Supplement: S2059866123000043sup001.pdf [file S2059866123000043sup001.pdf]

|                        |                       |                       |                       |                       |                       |                       |                       |                       |                       |                       |                       |
|------------------------|-----------------------|-----------------------|-----------------------|-----------------------|-----------------------|-----------------------|-----------------------|-----------------------|-----------------------|-----------------------|-----------------------|
|                        | 0                     |                       |                       |                       |                       |                       |                       |                       |                       |                       | 10                    |
|                        | (Least)               | 1                     | 2                     | 3                     | 4                     | 5                     | 6                     | 7                     | 8                     | 9                     | (Most)                |
| Frequent flyer account | <input type="radio"/> | <input type="radio"/> | <input type="radio"/> | <input type="radio"/> | <input type="radio"/> | <input type="radio"/> | <input type="radio"/> | <input type="radio"/> | <input type="radio"/> | <input type="radio"/> | <input type="radio"/> |

## DSHAREWILLING

Q2.

Thank you for your responses. As a reminder, you can choose not to continue the survey at any time. Our next question asks about your willingness to share various types of data with researchers. Please note that we will not be collecting any of those types of data for this study.

Are you willing to share the following types of data with researchers today?

|                                                         | Yes                   | No                    | I don't use this source of data |
|---------------------------------------------------------|-----------------------|-----------------------|---------------------------------|
| Facebook data                                           | <input type="radio"/> | <input type="radio"/> | <input type="radio"/>           |
| Twitter data                                            | <input type="radio"/> | <input type="radio"/> | <input type="radio"/>           |
| Instagram data                                          | <input type="radio"/> | <input type="radio"/> | <input type="radio"/>           |
| Snapchat data                                           | <input type="radio"/> | <input type="radio"/> | <input type="radio"/>           |
| Email History<br>(Gmail, Yahoo, Comcast, Verizon, etc.) | <input type="radio"/> | <input type="radio"/> | <input type="radio"/>           |
| Text Message and Phone Call Data                        | <input type="radio"/> | <input type="radio"/> | <input type="radio"/>           |
| Google search history                                   | <input type="radio"/> | <input type="radio"/> | <input type="radio"/>           |

|                                                      | Yes                   | No                    | I don't use this source of data |
|------------------------------------------------------|-----------------------|-----------------------|---------------------------------|
| Online purchase history (Amazon, Target, Ebay, etc.) | <input type="radio"/> | <input type="radio"/> | <input type="radio"/>           |
| Music streaming data (Spotify, Pandora, etc.)        | <input type="radio"/> | <input type="radio"/> | <input type="radio"/>           |
| Yelp reviews and ratings                             | <input type="radio"/> | <input type="radio"/> | <input type="radio"/>           |
| Ride-sharing history (Uber, Lyft, etc.)              | <input type="radio"/> | <input type="radio"/> | <input type="radio"/>           |
| Fitness tracker data (FitBit, Apple Watch, etc.)     | <input type="radio"/> | <input type="radio"/> | <input type="radio"/>           |
| Tax records and income history                       | <input type="radio"/> | <input type="radio"/> | <input type="radio"/>           |
| Credit card statement data                           | <input type="radio"/> | <input type="radio"/> | <input type="radio"/>           |
| Voting history                                       | <input type="radio"/> | <input type="radio"/> | <input type="radio"/>           |
| Prescription history (CVS, Walgreen's, etc.)         | <input type="radio"/> | <input type="radio"/> | <input type="radio"/>           |
| Electronic medical record data                       | <input type="radio"/> | <input type="radio"/> | <input type="radio"/>           |
| Geolocation (GPS from your phone or computer) data   | <input type="radio"/> | <input type="radio"/> | <input type="radio"/>           |
| Genetic data (23andMe, etc.)                         | <input type="radio"/> | <input type="radio"/> | <input type="radio"/>           |

## Data Health Relationship

Q3.

Thank you for your responses. As another reminder, you can choose not to continue the survey at any time. The following questions will ask you about the types of data as the question before, but instead of answering about willingness to share, we want to find out if you think each type of data is related to health.

For each data type, please select how much you agree or disagree that the data can be health related, rating from "Strongly Agree" to "Strongly Disagree."

For example, "Google search data" might be used to see if a patient with diabetes is searching for a new treatment or a blood glucose monitor. Another example might be if researchers collect social media posts that reflect one's health status or contain language that can reflect early signs of memory loss or other health conditions.

|                                                    | Strongly Agree        | Agree                 | Neutral               | Disagree              | Strongly disagree     |
|----------------------------------------------------|-----------------------|-----------------------|-----------------------|-----------------------|-----------------------|
| Facebook data contain health-related information.  | <input type="radio"/> | <input type="radio"/> | <input type="radio"/> | <input type="radio"/> | <input type="radio"/> |
| Twitter data contain health-related information.   | <input type="radio"/> | <input type="radio"/> | <input type="radio"/> | <input type="radio"/> | <input type="radio"/> |
| Instagram data contain health-related information. | <input type="radio"/> | <input type="radio"/> | <input type="radio"/> | <input type="radio"/> | <input type="radio"/> |
| Snapchat data contain health-related information.  | <input type="radio"/> | <input type="radio"/> | <input type="radio"/> | <input type="radio"/> | <input type="radio"/> |

|                                                                                                       | Strongly Agree        | Agree                 | Neutral               | Disagree              | Strongly disagree     |
|-------------------------------------------------------------------------------------------------------|-----------------------|-----------------------|-----------------------|-----------------------|-----------------------|
| Email accounts (Gmail, Yahoo, Comcast, Verizon, etc.) contain health-related information.             | <input type="radio"/> | <input type="radio"/> | <input type="radio"/> | <input type="radio"/> | <input type="radio"/> |
| Text message data and phone call history contains health-related information.                         | <input type="radio"/> | <input type="radio"/> | <input type="radio"/> | <input type="radio"/> | <input type="radio"/> |
| Google search history contains health-related information.                                            | <input type="radio"/> | <input type="radio"/> | <input type="radio"/> | <input type="radio"/> | <input type="radio"/> |
| Online purchase history (Amazon, Target, Google Buy, Ebay, etc.) contains health-related information. | <input type="radio"/> | <input type="radio"/> | <input type="radio"/> | <input type="radio"/> | <input type="radio"/> |
| Music streaming data (Spotify, Pandora, Apple Music, etc.) contains health-related information.       | <input type="radio"/> | <input type="radio"/> | <input type="radio"/> | <input type="radio"/> | <input type="radio"/> |
| Electronic Medical Records contain health-related information.                                        | <input type="radio"/> | <input type="radio"/> | <input type="radio"/> | <input type="radio"/> | <input type="radio"/> |

|                                                                                         | Strongly Agree        | Agree                 | Neutral               | Disagree              | Strongly disagree     |
|-----------------------------------------------------------------------------------------|-----------------------|-----------------------|-----------------------|-----------------------|-----------------------|
| Yelp reviews and ratings contain health-related information.                            | <input type="radio"/> | <input type="radio"/> | <input type="radio"/> | <input type="radio"/> | <input type="radio"/> |
| Ride-sharing history (Uber, Lyft, etc.) contains health-related information.            | <input type="radio"/> | <input type="radio"/> | <input type="radio"/> | <input type="radio"/> | <input type="radio"/> |
| Fitness Tracker/Wearables history contains health-related information.                  | <input type="radio"/> | <input type="radio"/> | <input type="radio"/> | <input type="radio"/> | <input type="radio"/> |
| Tax records and other income history contains health-related information.               | <input type="radio"/> | <input type="radio"/> | <input type="radio"/> | <input type="radio"/> | <input type="radio"/> |
| Credit card statements contain health-related information.                              | <input type="radio"/> | <input type="radio"/> | <input type="radio"/> | <input type="radio"/> | <input type="radio"/> |
| Voting history contains health-related information.                                     | <input type="radio"/> | <input type="radio"/> | <input type="radio"/> | <input type="radio"/> | <input type="radio"/> |
| Geolocation (GPS from your phone or computer) data contains health-related information. | <input type="radio"/> | <input type="radio"/> | <input type="radio"/> | <input type="radio"/> | <input type="radio"/> |

|                                                                   | Strongly Agree        | Agree                 | Neutral               | Disagree              | Strongly disagree     |
|-------------------------------------------------------------------|-----------------------|-----------------------|-----------------------|-----------------------|-----------------------|
| Genetic data (23andMe, etc.) contains health-related information. | <input type="radio"/> | <input type="radio"/> | <input type="radio"/> | <input type="radio"/> | <input type="radio"/> |

## Expectations

Q4.

Thank you for your responses. As a reminder, you can choose to not continue the survey at any time.

The following question will ask you about the type of feedback would you prefer to receive if you donated your electronic data to health researchers.

If you donated your electronic data to health researchers, what type of feedback would you prefer to receive? (Select all that apply)

Feedback about the effects of my eating and exercise habits

Feedback about how other habits contribute to my health

Health-related language analysis of my social media posts

Comparison my health data to other donors' data

Potential risk factors for health conditions

Other

Q4.1. If you selected "Other," then what types of feedback would you prefer to receive from researchers? If you did not select "Other," then please type "NA."



## Knowing Risk

Q5.

Thank you for your responses. As a reminder, you can choose to not continue the survey at any time.

The following question will present scenarios to allow you to assess whether or not you would want to know the results of an analysis of your donated data.

For each of the following scenarios, please indicate whether or not you would want to know the results of an analysis of your donated data.

|                                                                                                                                      | I would want to know  | I wouldn't want to know | Unsure                |
|--------------------------------------------------------------------------------------------------------------------------------------|-----------------------|-------------------------|-----------------------|
| Patterns in your data indicate that you are at higher-than-average risk for a treatable disease, like high blood pressure or asthma. | <input type="radio"/> | <input type="radio"/>   | <input type="radio"/> |
| Patterns in your data indicate that you are at higher-than-average risk for a non-treatable disease, like Alzheimers disease.        | <input type="radio"/> | <input type="radio"/>   | <input type="radio"/> |

I would want to know

I wouldn't want to know

Unsure

Patterns in your data indicate that you are at lower-than-average risk for any type of health condition.

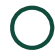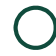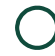

## Others Benefit

Q6.

Thank you for your responses. As a reminder, you can choose to not continue the survey at any time.

The following section contains questions asking you about how you feel you and/or others may be affected by you sharing your data.

Do you think others could benefit from you donating your electronic data?

Yes

Maybe

No

## Data Concern

Q7. Do you have or have you had any concerns about donating your electronic data to researchers today or in the future? If yes, please describe your concerns here. If not, please state "no" and elaborate as to why.

## Share Data

Q8. If you donated your electronic data to researchers, with whom would you want insights from your data to be shared with? (Select any that apply)

Myself

Family

Researchers

Doctor/healthcare provider

Social network

Others with health conditions like mine

## Donate Upon Death

Q9. If the opportunity arose in the future, would you consider donating your electronic data to health researchers after death?

Yes, all of my data

Yes, but only some of my data

No

Unsure

## Donate Upon Death - Data Type

Q10.

Which types of data would you feel comfortable donating after death? (Check all that apply)

Facebook data

Twitter data

Instagram data

Snapchat data

Email History (Gmail, Yahoo, Comcast, Verizon, etc.)

Text Message and Phone Call Data

Google search history

Online purchase history (Amazon, Target, Ebay, etc.)

Music streaming data (Spotify, Pandora, etc.)

Yelp reviews and ratings

Ride-sharing history (Uber, Lyft, etc.)

Fitness tracker data (FitBit, Apple Watch, etc.)

Tax records and income history

Credit card statement data

Voting history

Prescription history

Electronic medical record data

Geolocation (GPS from your phone or computer) data

Genetic (23andMe, etc.) data

## Privacy Threshold

Q11.

Thank you for your responses. As a reminder, you can choose to not continue the survey at any time.

This section will ask you questions about your opinions and beliefs about various types of online activities.

Are you concerned with the following statements?

|                                                                                                               | Yes                   | No                    | Unsure                |
|---------------------------------------------------------------------------------------------------------------|-----------------------|-----------------------|-----------------------|
| Information I share with friends online may be inappropriately disclosed by them to others.                   | <input type="radio"/> | <input type="radio"/> | <input type="radio"/> |
| People who you only know from online are not who they say they are.                                           | <input type="radio"/> | <input type="radio"/> | <input type="radio"/> |
| Other internet users might try to defraud you or abuse your personal information.                             | <input type="radio"/> | <input type="radio"/> | <input type="radio"/> |
| Online companies and websites might try and share your information to other parties without explicit consent. | <input type="radio"/> | <input type="radio"/> | <input type="radio"/> |

|                                                                                                                    | Yes                   | No                    | Unsure                |
|--------------------------------------------------------------------------------------------------------------------|-----------------------|-----------------------|-----------------------|
| Online companies and websites might use your information for purposes not explicitly stated in the privacy policy. | <input type="radio"/> | <input type="radio"/> | <input type="radio"/> |

Q12.

Do you agree or disagree with the following statements?

|                                                                                                      | Strongly Agree        | Agree                 | Neutral               | Disagree              | Strongly Disagree     |
|------------------------------------------------------------------------------------------------------|-----------------------|-----------------------|-----------------------|-----------------------|-----------------------|
| I am generally a private person in my everyday life.                                                 | <input type="radio"/> | <input type="radio"/> | <input type="radio"/> | <input type="radio"/> | <input type="radio"/> |
| I tend to reveal minimal personal information about myself online due to privacy concerns.           | <input type="radio"/> | <input type="radio"/> | <input type="radio"/> | <input type="radio"/> | <input type="radio"/> |
| I feel uncomfortable when other people have access to my personal information.                       | <input type="radio"/> | <input type="radio"/> | <input type="radio"/> | <input type="radio"/> | <input type="radio"/> |
| I believe that there is no need to be concerned about revealing personal information online.         | <input type="radio"/> | <input type="radio"/> | <input type="radio"/> | <input type="radio"/> | <input type="radio"/> |
| It does not bother me that a history of my online activities may be available to 3rd parties online. | <input type="radio"/> | <input type="radio"/> | <input type="radio"/> | <input type="radio"/> | <input type="radio"/> |

|                                                                                                                                                            | Strongly Agree        | Agree                 | Neutral               | Disagree              | Strongly Disagree     |
|------------------------------------------------------------------------------------------------------------------------------------------------------------|-----------------------|-----------------------|-----------------------|-----------------------|-----------------------|
| I regularly use anti-virus/phishing/spamming software, programs, or tools, or clear my browsing history/cookies/cache or restrict my app data permissions. | <input type="radio"/> | <input type="radio"/> | <input type="radio"/> | <input type="radio"/> | <input type="radio"/> |

Q13.

Have any of the following events happened to you online?

|                                                                                   | Yes                   | No                    | Unsure                |
|-----------------------------------------------------------------------------------|-----------------------|-----------------------|-----------------------|
| An account of yours was accessed by someone you didn't give permission.           | <input type="radio"/> | <input type="radio"/> | <input type="radio"/> |
| The privacy of your personal information was violated.                            | <input type="radio"/> | <input type="radio"/> | <input type="radio"/> |
| Your reputation was negatively affected as a result of information posted online. | <input type="radio"/> | <input type="radio"/> | <input type="radio"/> |
| You had an unpleasant experience as a result of information you gave out online.  | <input type="radio"/> | <input type="radio"/> | <input type="radio"/> |

|                                                     | Yes                   | No                    | Unsure                |
|-----------------------------------------------------|-----------------------|-----------------------|-----------------------|
| You were the victim of fraud and/or identity theft. | <input type="radio"/> | <input type="radio"/> | <input type="radio"/> |

## Demographics

Q14.

Thank you for your responses. As a reminder, you can choose to not continue at any time.

This final section contains questions that ask you about your demographics. Please make a selection from each category as it applies to you.

Age (years)

Under 20

21 to 30

31 to 40

41 to 50

51 to 60

over 60

Q15. Education Level

Middle school and below

High school

Some College/Associates/Trade School



Bachelors

Masters

Doctorate or other terminal degree

Q16. Duration of using online medical websites (years)

Less than 1

2 to 3

4 to 5

6 to 7

More than 7

Never

Unsure

Q17. Annual frequency of getting ill

Less than 1

2 to 3

4 to 6

7 to 10

More than 10
